# Supplementary material for: Inhibition of Axin1 in osteoblast precursor cells leads to defects in postnatal bone growth through suppressing osteoclast formation
Source: PubMed Central journal article supplement (PMC7424530; doi:10.1038/s41413-020-0104-5), 2020-08-12
Supplement: 41413_2020_104_MOESM1_ESM.pdf [file 41413_2020_104_MOESM1_ESM.pdf]

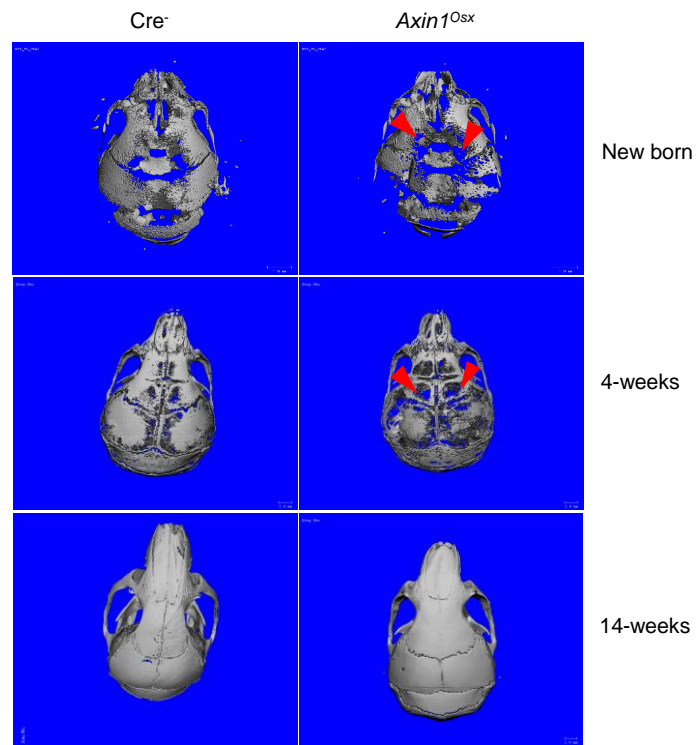

Figure S1
